# Supplementary material for: The inheritance of female colour polymorphism in Ischnura genei (Zygoptera: Coenagrionidae), with observations on melanism under laboratory conditions
Source: PeerJ. 2016 Sep 1;4:e2380. doi: 10.7717/peerj.2380 (PMC5012302; doi:10.7717/peerj.2380)
Supplement: Data S1 [file peerj-04-2380-s001.xlsx]

## Sheet: P generation clutches
P female	Morph	Oviposition	Hatching	Days until first hatch	Total eggs laid	Fertile eggs	Infertile eggs	Clutch succes (%)
A	A	2011-08-19	2011-09-02	14	78	56	22	0.717949
B	A	2011-08-24	2011-09-05	12	174	105	69	0.603448
C	A	2011-08-24	2011-09-05	12	217	202	15	0.930876
D	A	2011-08-24	2011-09-07	14	188	150	38	0.797872
E	A	2011-08-24	2011-09-05	12	135	120	15	0.888889
F	A	2011-08-24	2011-09-05	12	138	115	23	0.833333
G	I	2011-08-19	2011-09-02	14	245	228	17	0.930612
H	I	2011-08-19	2011-09-02	14	145	101	44	0.696552
I	I	2011-08-19	2011-09-02	14	231	211	20	0.91342
J	I	2011-08-19	2011-09-02	14	373	358	15	0.959786
K	I	2011-08-19	2011-09-02	14	83	34	49	0.409639
L	O	2011-08-19	2011-09-05	17	185	111	74	0.6
M	O	2011-08-19	2011-09-02	14	228	222	6	0.973684
N	O	2011-08-24	2011-09-05	12	337	334	3	0.991098
O	O	2011-08-24	2011-09-05	12	114	112	2	0.982456
P	O	2011-08-24	2011-09-02	9	175	174	1	0.994286
Q	O	2011-08-24	2011-09-05	12	97	91	6	0.938144
R	O	2011-08-24	2011-09-02	9	272	272	0	1
S	O	2011-08-24	2011-09-02	9	259	212	47	0.818533
T	O	2011-08-24	2011-09-07	14	147	144	3	0.979592

## Sheet: Emergences
Generation (F)	ID	Sex	Morph	Mother
1	19	M		B
1	99	F	A	B
1	126	F	A	B
1	284	F	A	B
1	459	F	A	B
1	484	F	A	B
1	233	F	A	B
1	70	F	O	B
1	5	M		C
1	27	M		C
1	30	M		C
1	34	M		C
1	41	M		C
1	51	M		C
1	93	M		C
1	112	M		C
1	212	M		C
1	248	M		C
1	22	F	A	C
1	23	F	A	C
1	31	F	A	C
1	38	F	A	C
1	45	F	A	C
1	54	F	A	C
1	63	F	A	C
1	77	F	A	C
1	80	F	A	C
1	81	F	A	C
1	84	F	A	C
1	88	F	A	C
1	94	F	A	C
1	98	F	A	C
1	129	F	A	C
1	161	F	A	C
1	174	F	A	C
1	187	F	A	C
1	188	F	A	C
1	200	F	A	C
1	210	F	A	C
1	272	F	A	C
1	368	F	A	C
1	404	F	A	C
1	499	F	A	C
1	15	F	O	C
1	71	F	O	C
1	83	F	O	C
1	123	F	O	C
1	470	F	O	C
1	475	F	O	C
1	59	M		C
1	69	M		C
1	73	M		C
1	75	M		C
1	460	M		C
1	13	M		D
1	32	M		D
1	33	M		D
1	52	M		D
1	57	M		D
1	87	M		D
1	91	M		D
1	104	M		D
1	117	M		D
1	122	M		D
1	125	M		D
1	130	M		D
1	194	M		D
1	214	M		D
1	263	M		D
1	72	F	A	D
1	85	F	A	D
1	116	F	A	D
1	234	F	A	D
1	245	F	A	D
1	401	F	A	D
1	416	F	A	D
1	492	F	A	D
1	502	F	A	D
1	48	F	O	D
1	103	F	O	D
1	147	F	O	D
1	149	F	O	D
1	173	F	O	D
1	303	F	O	D
1	304	F	O	D
1	386	F	O	D
1	438	F	O	D
1	495	F	O	D
1	68	M		D
1	14	M		E
1	25	M		E
1	28	M		E
1	44	M		E
1	46	M		E
1	47	M		E
1	89	M		E
1	95	M		E
1	97	M		E
1	102	M		E
1	139	M		E
1	167	M		E
1	170	M		E
1	172	M		E
1	181	M		E
1	183	M		E
1	310	M		E
1	105	F	A	E
1	132	F	A	E
1	175	F	A	E
1	189	F	A	E
1	190	F	A	E
1	351	F	A	E
1	367	F	A	E
1	392	F	A	E
1	100	F	I	E
1	148	F	I	E
1	295	F	I	E
1	56	F	O	E
1	219	F	O	E
1	275	F	O	E
1	61	M		E
1	66	M		E
1	110	M		G
1	131	M		G
1	152	M		G
1	160	M		G
1	164	M		G
1	171	M		G
1	184	M		G
1	193	M		G
1	195	M		G
1	196	M		G
1	197	M		G
1	198	M		G
1	208	M		G
1	216	M		G
1	251	M		G
1	253	M		G
1	264	M		G
1	266	M		G
1	269	M		G
1	278	M		G
1	279	M		G
1	280	M		G
1	297	M		G
1	299	M		G
1	301	M		G
1	307	M		G
1	320	M		G
1	321	M		G
1	323	M		G
1	330	M		G
1	331	M		G
1	332	M		G
1	337	M		G
1	346	M		G
1	352	M		G
1	354	M		G
1	412	F	A	G
1	136	F	I	G
1	153	F	I	G
1	223	F	I	G
1	224	F	I	G
1	256	F	I	G
1	259	F	I	G
1	270	F	I	G
1	296	F	I	G
1	285	F	I	G
1	287	F	I	G
1	313	F	I	G
1	314	F	I	G
1	315	F	I	G
1	317	F	I	G
1	326	F	I	G
1	335	F	I	G
1	336	F	I	G
1	350	F	I	G
1	358	F	I	G
1	365	F	I	G
1	366	F	I	G
1	381	F	I	G
1	382	F	I	G
1	410	F	I	G
1	419	F	I	G
1	429	F	I	G
1	432	F	I	G
1	465	F	I	G
1	286	F	I	G
1	67	M		G
1	79	M		G
1	375	M		G
1	377	M		G
1	396	F		G
1	408	M		G
1	415	M		G
1	434	M		G
1	514	M		G
1	213	M		H
1	353	M		H
1	373	F	I	H
1	411	F	I	H
1	107	F	O	H
1	111	F	O	H
1	159	F	O	H
1	243	F	O	H
1	334	F	O	H
1	501	F	O	H
1	439	M		H
1	124	M		I
1	236	M		I
1	250	M		I
1	342	M		I
1	20	F	I	I
1	76	F	I	I
1	127	F	I	I
1	417	F	I	I
1	421	F	I	I
1	476	F	I	I
1	82	F	O	I
1	405	F	O	I
1	461	F	O	I
1	387	M		I
1	400	M		I
1	90	M		J
1	217	M		J
1	237	M		J
1	282	M		J
1	361	M		J
1	293	F	A	J
1	271	F	I	J
1	424	F	I	J
1	9	F	O	J
1	437	F	O	J
1	516	F	O	J
1	399	M		J
1	407	M		J
1	409	M		J
1	414	M		J
1	435	M		J
1	464	M		J
1	473	M		J
1	478	M		J
1	2	M		L
1	37	M		L
1	154	M		L
1	156	M		L
1	157	M		L
1	163	M		L
1	302	M		L
1	324	M		L
1	133	F	I	L
1	222	F	I	L
1	257	F	I	L
1	201	F	O	L
1	262	F	O	L
1	384	F	O	L
1	74	M		L
1	191	M		M
1	203	M		M
1	308	M		M
1	309	M		M
1	329	M		M
1	369	M		M
1	436	F	I	M
1	186	F	O	M
1	268	F	O	M
1	362	F	O	M
1	371	F	O	M
1	397	F	O	M
1	413	F	O	M
1	454	F	O	M
1	482	F	O	M
1	498	F	O	M
1	515	F	O	M
1	523	F	O	M
1	526	F	O	M
1	390	M		M
1	394	M		M
1	427	M		M
1	443	M		M
1	449	M		M
1	453	M		M
1	467	M		M
1	536	M		M
1	541	M		M
1	547	M		M
1	550	M		M
1	290	F	O	N
1	344	F	O	N
1	380	F	O	N
1	423	F	O	N
1	455	F	O	N
1	479	F	O	N
1	488	F	O	N
1	489	F	O	N
1	504	F	O	N
1	507	F	O	N
1	517	F	O	N
1	518	F	O	N
1	520	F	O	N
1	521	F	O	N
1	522	F	O	N
1	527	F	O	N
1	531	F	O	N
1	543	F	O	N
1	546	F	O	N
1	548	F	O	N
1	551	F	O	N
1	554	F	O	N
1	555	F	O	N
1	556	F	O	N
1	558	F	O	N
1	559	F	O	N
1	560	F	O	N
1	561	F	O	N
1	562	F	O	N
1	563	F	O	N
1	565	F	O	N
1	566	F	O	N
1	567	F	O	N
1	568	F	O	N
1	374	M		N
1	403	M		N
1	406	M		N
1	456	M		N
1	480	M		N
1	487	M		N
1	503	M		N
1	512	M		N
1	513	M		N
1	519	M		N
1	524	M		N
1	525	M		N
1	528	M		N
1	529	M		N
1	530	M		N
1	533	M		N
1	534	M		N
1	535	M		N
1	537	M		N
1	538	M		N
1	540	M		N
1	542	M		N
1	544	M		N
1	545	M		N
1	549	M		N
1	552	M		N
1	557	M		N
1	8	M		O
1	118	M		O
1	128	M		O
1	140	M		O
1	179	M		O
1	239	M		O
1	246	M		O
1	281	M		O
1	338	M		O
1	255	F	O	O
1	221	F	I	O
1	325	F	I	O
1	36	F	O	O
1	109	F	O	O
1	121	F	O	O
1	205	F	O	O
1	261	F	O	O
1	274	F	O	O
1	349	F	O	O
1	357	F	O	O
1	372	F	O	O
1	553	F	O	O
1	564	F	O	O
1	64	M		O
1	388	M		O
1	457	M		O
1	6	M		P
1	17	M		P
1	40	M		P
1	43	M		P
1	50	M		P
1	55	M		P
1	108	M		P
1	113	M		P
1	143	M		P
1	145	M		P
1	150	M		P
1	180	M		P
1	192	M		P
1	199	M		P
1	202	M		P
1	207	M		P
1	230	M		P
1	231	M		P
1	232	M		P
1	242	M		P
1	249	M		P
1	370	M		P
1	135	F	A	P
1	49	F	O	P
1	60	F	O	P
1	166	F	O	P
1	168	F	O	P
1	185	F	O	P
1	244	F	O	P
1	277	F	O	P
1	355	F	O	P
1	376	F	O	P
1	422	F	O	P
1	431	F	O	P
1	497	F	O	P
1	506	F	O	P
1	485	M		P
1	486	M		P
1	491	M		P
1	11	M		Q
1	16	M		Q
1	86	M		Q
1	96	M		Q
1	142	M		Q
1	155	M		Q
1	158	M		Q
1	229	M		Q
1	238	M		Q
1	343	M		Q
1	345	M		Q
1	220	F	O	Q
1	235	F	O	Q
1	273	F	O	Q
1	276	F	O	Q
1	305	F	O	Q
1	312	F	O	Q
1	363	F	O	Q
1	364	F	O	Q
1	385	F	O	Q
1	395	F	O	Q
1	418	F	O	Q
1	446	F	O	Q
1	451	F	O	Q
1	469	F	O	Q
1	483	F	O	Q
1	490	F	O	Q
1	505	F	O	Q
1	509	F	O	Q
1	21	M		Q
1	378	M		Q
1	430	M		Q
1	447	M		Q
1	448	M		Q
1	452	M		Q
1	466	M		Q
1	481	M		Q
2	1	M		9
2	2	M		9
2	3	F	O	9
2	5	F	O	9
2	14	M		9
2	15	F	O	9
2	16	M		9
2	20	F	O	9
2	24	F	O	9
2	25	M		9
2	54	F	O	9
2	102	M		9
2	150	M		9
2	164	F	O	9
2	165	F	O	9
2	167	M		9
2	169	F	O	9
2	171	F	O	9
2	172	F	O	9
2	174	F	O	9
2	206	M		9
2	47	F	O	161
2	62	F	O	161
2	73	M		161
2	85	M		161
2	138	M		161
2	143	F	O	161
2	151	M		161
2	162	F	A	161
2	163	M		161
2	228	M		161
2	232	M		161
2	235	M		161
2	237	M		161
2	253	M		161
2	256	M		161
2	257	M		161
2	260	F	A/I	161
2	267	F	A/I	161
2	270	M		161
2	274	M		161
2	275	M		161
2	290	M		161
2	311	M		161
2	318	M		161
2	329	M		161
2	331	F	O	161
2	351	F	A/I	161
2	357	F	O	161
2	358	M		161
2	396	F	A/I	161
2	410	M		161
2	485	M		161
2	539	M		161
2	550	F	A/I	161
2	551	M		161
2	579	F	A/I	161
2	598	M		161
2	601	F	A/I	161
2	603	F	O	161
2	635	F	O	161
2	665	F	A	161
2	680	F	A	161
2	682	F	A	161
2	717	F	A	161
2	70	M		168
2	97	F	O	168
2	115	M		168
2	146	F	O	168
2	193	M		168
2	223	F	O	168
2	239	F	O	168
2	248	F	O	168
2	276	F	O	168
2	285	M		168
2	306	M		168
2	307	F	O	168
2	310	F	O	168
2	317	M		168
2	321	F	O	168
2	332	M		168
2	337	M		168
2	350	F	NA	168
2	368	F	NA	168
2	386	F	NA	168
2	399	F	O	168
2	462	M		168
2	468	M		168
2	470	M		168
2	590	M		168
2	595	F	O	168
2	674	F	O	168
2	789	F	O	168
2	53	F	A	190
2	77	F	A	190
2	90	M		190
2	110	F	A	190
2	182	F	A/I	190
2	240	F	A/I	190
2	286	M		190
2	313	F	NA	190
2	370	F	A/I	190
2	376	M		190
2	378	M		190
2	385	M		190
2	394	F	O	190
2	413	F	O	190
2	415	M		190
2	421	M		190
2	428	F	O	190
2	530	F	O	190
2	533	F	A	190
2	547	F	O	190
2	618	F	A/I	190
2	625	F	I	190
2	626	M		190
2	681	F	A	190
2	685	F	A	190
2	702	F	NA	190
2	703	F	A/I	190
2	742	F	A/I	190
2	59	F	O	200
2	79	F	O	200
2	81	F	A	200
2	87	F	O	200
2	89	M		200
2	95	F	A	200
2	109	F	O	200
2	135	F	O	200
2	137	M		200
2	140	F	O	200
2	153	M		200
2	154	M		200
2	158	M		200
2	159	M		200
2	189	F	A/I	200
2	190	F	I	200
2	192	F	A/I	200
2	251	F	O	200
2	264	F	O	200
2	277	M		200
2	294	F	I	200
2	302	M		200
2	314	F	NA	200
2	327	M		200
2	335	M		200
2	341	F	A/I	200
2	429	M		200
2	456	F	A/I	200
2	483	F	A/I	200
2	514	M		200
2	515	F	A/I	200
2	562	F	I	200
2	725	F	I	200
2	726	F	A/I	200
2	751	F	I	200
2	844	F	I	200
2	851	F	O	200
2	61	F	O	222
2	68	M		222
2	170	F	O	222
2	175	M		222
2	195	M		222
2	214	M		222
2	222	M		222
2	245	M		222
2	252	F	O	222
2	279	M		222
2	296	M		222
2	320	F	I	222
2	352	M		222
2	353	M		222
2	359	M		222
2	362	M		222
2	363	M		222
2	375	F	O	222
2	379	F	I	222
2	384	M		222
2	391	M		222
2	402	M		222
2	404	M		222
2	435	F	O	222
2	461	M		222
2	478	M		222
2	531	F	NA	222
2	532	F	I	222
2	536	M		222
2	545	F	O	222
2	552	M		222
2	575	F	O	222
2	578	F	I	222
2	608	M		222
2	615	F	O	222
2	616	F	O	222
2	637	F	I	222
2	659	F	I	222
2	721	F	O	222
2	752	M		222
2	104	F	O	243
2	106	M		243
2	131	F	O	243
2	145	M		243
2	220	F	O	243
2	221	F	O	243
2	265	M		243
2	268	M		243
2	291	F	I	243
2	298	F	A/I	243
2	345	F	O	243
2	424	M		243
2	577	F	O	243
2	627	M		243
2	644	F	A	243
2	672	F	O	243
2	675	F	A	243
2	686	F	O	243
2	741	F	A/I	243
2	743	F	A	243
2	809	F	A	243
2	181	M		255
2	247	F	I	255
2	338	M		255
2	430	M		255
2	447	M		255
2	451	M		255
2	452	F	O	255
2	465	F	I	255
2	466	F	O	255
2	480	M		255
2	519	M		255
2	534	M		255
2	535	M		255
2	573	M		255
2	574	F	NA	255
2	633	F	O	255
2	645	F	O	255
2	646	F	O	255
2	671	F	I	255
2	673	F	O	255
2	709	F	O	255
2	732	F	O	255
2	768	F	I	255
2	775	F	I	255
2	790	F	I	255
2	805	F	O	255
2	810	F	O	255
2	835	F	O	255
2	847	F	O	255
2	854	F	A/I	255
2	901	F	NA	255
2	907	F	O	255
2	152	F	O	257
2	178	M		257
2	209	F	I	257
2	254	F	O	257
2	273	F	O	257
2	336	M		257
2	339	M		257
2	356	M		257
2	365	M		257
2	367	M		257
2	401	F	O	257
2	422	M		257
2	427	F	I	257
2	433	M		257
2	436	M		257
2	441	M		257
2	453	F	O	257
2	457	M		257
2	481	M		257
2	482	M		257
2	503	M		257
2	541	M		257
2	543	M		257
2	548	F	O	257
2	553	M		257
2	605	M		257
2	631	F	O	257
2	634	F	O	257
2	639	F	I	257
2	651	F	A/I	257
2	652	F	I	257
2	657	F	O	257
2	660	F	I	257
2	664	F	A/I	257
2	667	F	O	257
2	679	F	O	257
2	684	F	I	257
2	691	F	O	257
2	693	F	O	257
2	815	F	O	257
2	63	F	A	258
2	67	M		258
2	71	M		258
2	74	M		258
2	88	F	A/I	258
2	128	M		258
2	132	F	A	258
2	147	M		258
2	155	M		258
2	157	F	A	258
2	161	F	A	258
2	205	F	O	258
2	207	M		258
2	210	M		258
2	211	F	A	258
2	213	F	A	258
2	229	F	A	258
2	250	F	A	258
2	45	F	O	262
2	60	F	O	262
2	176	M		262
2	180	F	O	262
2	201	M		262
2	215	F	O	262
2	227	F	O	262
2	243	M		262
2	288	M		262
2	304	F	O	262
2	312	M		262
2	323	F	O	262
2	371	M		262
2	393	F	O	262
2	405	M		262
2	407	M		262
2	418	M		262
2	431	M		262
2	438	F	O	262
2	444	F	O	262
2	450	M		262
2	455	F	O	262
2	473	M		262
2	479	M		262
2	501	M		262
2	517	F	O	262
2	522	M		262
2	558	M		262
2	594	M		262
2	624	F	O	262
2	636	F	O	262
2	666	F	O	262
2	689	F	O	262
2	696	F	O	262
2	704	F	NA	262
2	839	F	O	262
2	133	M		268
2	173	F	I	268
2	185	M		268
2	187	F	O	268
2	204	M		268
2	266	M		268
2	344	M		268
2	354	M		268
2	397	F	I	268
2	448	M		268
2	484	F	A/I	268
2	520	M		268
2	542	M		268
2	544	F	NA	268
2	563	M		268
2	583	M		268
2	632	F	O	268
2	654	F	O	268
2	720	F	O	268
2	739	F	I	268
2	758	F	I	268
2	780	M		268
2	808	F	?	268
2	928	F	O	268
2	57	F	A	272
2	66	M		272
2	86	M		272
2	94	F	A	272
2	98	F	A	272
2	113	F	A	272
2	127	M		272
2	129	F	A	272
2	134	M		272
2	141	M		272
2	191	F	A	272
2	202	F	O	272
2	225	M		272
2	230	M		272
2	334	F	O	272
2	342	F	A	272
2	346	F	A/I	272
2	366	F	A/I	272
2	373	M		272
2	383	F	O	272
2	476	M		272
2	566	M		272
2	604	F	A/I	272
2	614	F	A/I	272
2	714	F	O	272
2	64	M		274
2	91	F	O	274
2	203	M		274
2	343	M		274
2	443	M		274
2	495	M		274
2	576	F	O	274
2	669	F	O	274
2	690	F	NA	274
2	722	F	O	274
2	724	F	O	274
2	765	F	O	274
2	767	F	O	274
2	782	F	O	274
2	800	F	O	274
2	804	F	O	274
2	817	F	O	274
2	910	F	O	274
2	233	M		285
2	271	F	O	285
2	303	F	O	285
2	325	M		285
2	408	M		285
2	411	M		285
2	442	M		285
2	449	M		285
2	489	M		285
2	496	M		285
2	505	F	I	285
2	524	M		285
2	560	F	NA	285
2	568	M		285
2	661	F	O	285
2	676	F	I	285
2	695	F	O	285
2	706	F	O	285
2	707	F	O	285
2	731	F	I	285
2	757	F	I	285
2	772	F	O	285
2	773	F	I	285
2	777	F	I	285
2	792	F	I	285
2	797	F	O	285
2	811	F	I	285
2	834	F	O	285
2	838	F	O	285
2	859	F	I	285
2	919	F	I	285
2	940	F	I	285
2	943	F	O	285
2	949	F	NA	285
2	389	M		286
2	392	M		286
2	440	F	I	286
2	493	F	O	286
2	504	F	NA	286
2	521	M		286
2	581	M		286
2	602	F	O	286
2	708	F	I	286
2	762	F	O	286
2	763	F	O	286
2	779	F	I	286
2	791	F	I	286
2	793	F	O	286
2	813	F	I	286
2	850	F	I	286
2	856	F	O	286
2	865	F	O	286
2	866	F	I	286
2	876	F	I	286
2	886	F	O	286
2	892	F	O	286
2	913	F	O	286
2	924	F	O	286
2	121	M		290
2	555	M		290
2	136	F	O	291
2	242	M		291
2	326	M		291
2	600	F	O	291
2	638	F	O	291
2	801	F	I	291
2	803	F	O	291
2	860	F	O	291
2	878	F	I	291
2	879	F	O	291
2	885	F	I	291
2	887	F	O	291
2	893	F	O	291
2	906	F	I	291
2	935	F	O	291
2	936	F	O	291
2	974	F	O	291
2	93	F	O	293
2	100	M		293
2	272	M		293
2	278	M		293
2	284	F	I	293
2	299	F	O	293
2	305	M		293
2	319	M		293
2	403	M		293
2	446	M		293
2	490	F	I	293
2	507	F	I	293
2	516	F	I	293
2	729	F	I	293
2	756	F	I	293
2	799	F	I	293
2	78	M		325
2	406	M		325
2	459	M		325
2	477	M		325
2	486	M		325
2	488	M		325
2	492	F	O	325
2	512	M		325
2	546	F	O	325
2	554	M		325
2	694	F	I	325
2	698	F	I	325
2	715	F	I	325
2	730	F	I	325
2	740	F	I	325
2	750	F	O	325
2	796	F	I	325
2	816	F	O	325
2	836	F	O	325
2	549	F	I	333
2	904	F	O	333
2	905	F	I	333
2	944	F	O	333
2	952	F	O	333
2	957	F	O	333
2	994	F	O	333
2	1031	F	O	333
2	1062	F	I	333
2	1066	F	O	333
2	122	F	A/I	368
2	183	M		368
2	194	M		368
2	196	F	A/I	368
2	283	F	O	368
2	425	M		368
2	494	F	A/I	368
2	653	F	A	368
2	677	F	A	368
2	855	F	A	368
2	781	F	I	412
2	786	F	A	412
2	788	F	I	412
2	802	F	A	412
2	819	F	A	412
2	822	F	I	412
2	830	F	A	412
2	831	F	A/I	412
2	833	F	I	412
2	863	F	A	412
2	880	F	A/I	412
2	888	F	A	412
2	895	F	A	412
2	912	F	A	412
2	920	F	I	412
2	925	F	A	412
2	938	F	I	412
2	966	F	I	412
2	975	F	A	412
2	1024	F	A/I	412
2	1037	F	A	412
2	1038	F	I	412
2	1040	F	A	412
2	1067	F	A	412
2	1072	F	A/I	412
2	1076	F	A	412
2	1078	F	A/I	412
2	1081	F	A	412
2	1092	F	A/I	412
2	1093	F	A	412
2	1094	F	I	412
2	1097	F	A	412
2	1101	F	A	412
2	687	F	O	471
2	716	F	O	471
2	744	F	O	471
2	761	F	O	471
2	771	F	O	471
2	812	F	O	471
2	818	F	O	471
2	823	F	O	471
2	894	F	O	471
2	922	F	O	471
2	683	F	O	476
2	692	F	I	476
2	745	F	I	476
2	748	F	I	476
2	774	F	I	476
2	785	F	O	476
2	787	F	O	476
2	794	F	I	476
2	795	F	I	476
2	829	F	O	476
2	852	F	O	476
2	861	F	O	476
2	915	F	O	476
2	931	F	A	499
2	951	M		499
2	987	M		499
2	993	F	A	499
2	1004	F	A	499
2	1006	M		499
2	1015	F	A	499
2	1019	F	A	499
2	1027	F	A	499
2	1035	F	A	499
2	1042	M		499
2	1043	F	A/I	499
2	1052	F	A/I	499
2	1055	F	A/I	499
2	1063	M		499
2	1069	M		499
2	1070	M		499
2	1087	F	A	499
2	1091	M		499
2	1104	F	A	499
2	712	F	O	508
2	853	F	O	508
2	884	F	I	508
2	896	F	I	508
2	900	F	O	508
2	903	F	O	508
2	911	F	O	508
2	914	F	O	508
2	932	F	I	508
2	941	F	I	508
2	959	F	I	508
2	967	F	O	508
2	985	F	I	508
2	986	F	I	508
2	991	F	O	508
2	996	F	O	508
2	1005	F	O	508
2	832	F	I	510
2	846	F	O	510
2	965	F	I	510
2	971	F	O	510
2	992	F	A	510
2	1008	F	A	510
2	1009	F	O	510
2	1010	F	A/I	510
2	1011	F	A	510
2	1029	F	O	510
2	1065	F	A/I	510
2	226	F	A	Exp 9.3
2	355	M		Exp 9.3
2	398	F	O	Exp 9.3
2	471	M		Exp 9.3
2	609	M		Exp 9.3
2	658	F	A/I	Exp 9.3
2	727	F	O	Exp 9.3
2	760	F	O	Exp 9.3
2	837	F	A	Exp 9.3
2	867	F	O	Exp 9.3
2	872	F	O	Exp 9.3
2	877	F	A	Exp 9.3
2	897	F	O	Exp 9.3
2	902	F	O	Exp 9.3
2	937	F	O	Exp 9.3
2	939	F	A	Exp 9.3
2	947	F	O	Exp 9.3
2	953	F	O	Exp 9.3
2	963	F	O	Exp 9.3
2	964	F	A	Exp 9.3
2	977	F	A/I	Exp 9.3
2	978	F	O	Exp 9.3
2	982	F	O	Exp 9.3
2	995	F	A	Exp 9.3
2	1003	F	O	Exp 9.3
2	1071	F	A	Exp 9.3

## Sheet: Sex-ratio
Generation (F)	ID	Morph	Offspring males (N)	Offspring females (N)	Sex-ratio
1	A	A	3	2	1.5
1	B	A	1	7	0.142857
1	C	A	15	31	0.483871
1	D	A	16	19	0.842105
1	E	A	19	14	1.35714
1	G	I	44	31	1.41935
1	H	I	3	8	0.375
1	I	I	6	9	0.666667
1	J	I	13	6	2.16667
1	L	O	9	6	1.5
1	M	O	17	13	1.30769
1	N	O	27	34	0.794118
1	O	O	12	14	0.857143
1	P	O	25	14	1.78571
1	Q	O	19	18	1.05556
2	9	O	9	12	0.75
2	161	A	25	19	1.31579
2	168	O	12	16	0.75
2	190	A	8	20	0.4
2	200	A	12	25	0.48
2	222	I	23	17	1.35294
2	243	O	6	15	0.4
2	255	O	10	22	0.454545
2	257	I	18	22	0.818182
2	258	A	8	10	0.8
2	262	O	17	19	0.894737
2	268	O	12	12	1
2	272	A	10	15	0.666667
2	274	O	5	13	0.384615
2	285	I	10	24	0.416667
2	286	I	4	20	0.2
2	291	O	2	15	0.133333
2	293	I	7	9	0.777778
2	325	I	8	11	0.727273
2	333	O	0	10	0
2	368	A	3	7	0.428571
2	412	A	0	33	0
2	471	O	0	10	0
2	476	I	0	13	0
2	499	A	8	12	0.666667
2	508	O	0	17	0
2	510	A	0	11	0
2	Exp 9.3	O	3	23	0.130435

## Sheet: Models presentation
Models presentation in Riu Mannu, near Tula, Coghinas dam. 24/08/2012
The first presentation was random. Then, the following models were presented in the same order for all tests
Presentations were performed until reach 10 responses for each model. Models were alive. They were tied with a thin wire that allowed their flight
Males tested were captured and marked
Model	Start	End	No response	Approach to the model	Attemp to grasp the model in tandem	Tandem
androchrome 1	10:00:00	10:12:00	3	9	0	1
androchrome 2	10:37:00	10:47:00	2	8	2	0
androchrome 3	11:23:00	11:33:00	0	9	1	0
infuscans 1	09:19:00	09:40:00	4	4	6	0
infuscans 2	10:15:00	10:23:00	0	1	6	3
infuscans 3	10:50:00	11:02:00	3	4	6	0
male 1	09:15:00	09:20:00	2	8	2	0
male 2	09:22:00	09:29:00	3	7	3	0
male 3	09:32:00	09:39:00	2	7	3	0
aurantiaca 1	09:45:00	09:55:00	2	3	6	1
aurantiaca 2	10:26:00	10:35:00	2	6	3	1
aurantiaca 3	11:07:00	11:19:00	2	4	6	0
